# Supplementary material for: A Pedigree-Based Map of Recombination in the Domestic Dog Genome
Source: PubMed Central journal article supplement (PMC5100850; doi:10.1534/g3.116.034678), 2016-09-02
Supplement: supp_g3.116.034678_FigureS3.pdf [file supp_g3.116.034678_FigureS3.pdf]

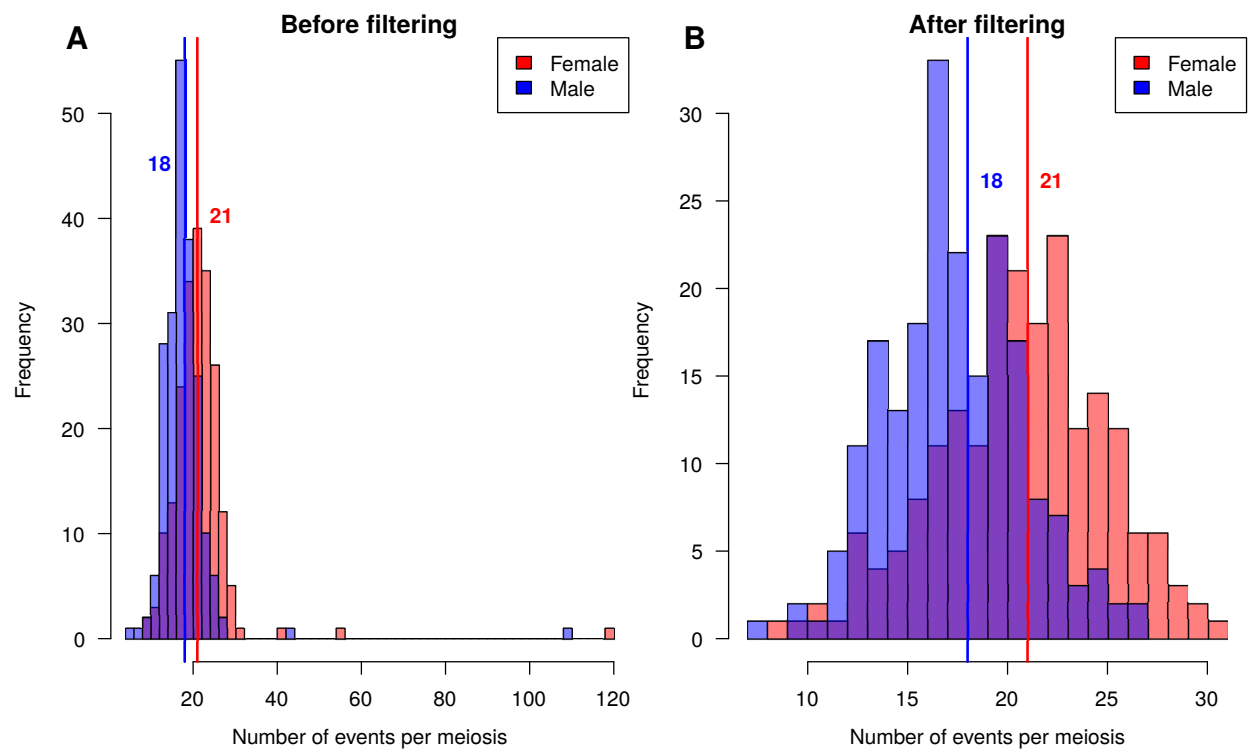

Figure S3: Distribution of the number of crossover events per meiosis. Panel A shows all meioses prior to filtering ( $n=414$ ), and panel B shows the filtered set ( $n=408$ ). Female meioses are shown in red, males in blue.
