# Supplementary material for: A Pedigree-Based Map of Recombination in the Domestic Dog Genome
Source: PubMed Central journal article supplement (PMC5100850; doi:10.1534/g3.116.034678), 2016-09-02
Supplement: supp_g3.116.034678_FigureS7.pdf [file supp_g3.116.034678_FigureS7.pdf]

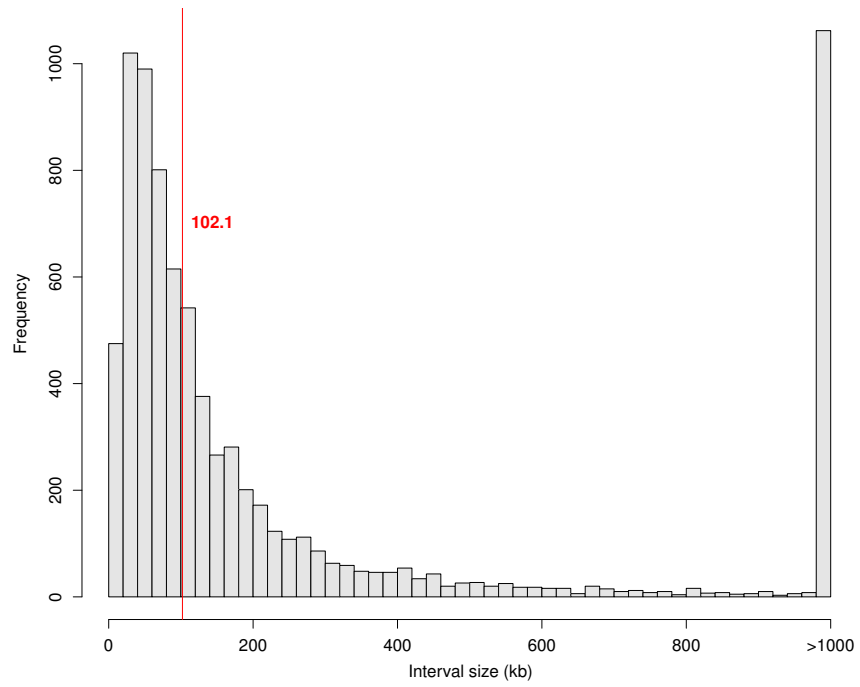

Figure S7: Distribution of crossover interval size. The vertical red line represents the median interval size of 102.1 kb.
