# Supplementary material for: A Pedigree-Based Map of Recombination in the Domestic Dog Genome
Source: PubMed Central journal article supplement (PMC5100850; doi:10.1534/g3.116.034678), 2016-09-02
Supplement: supp_g3.116.034678_FigureS10.pdf [file supp_g3.116.034678_FigureS10.pdf]

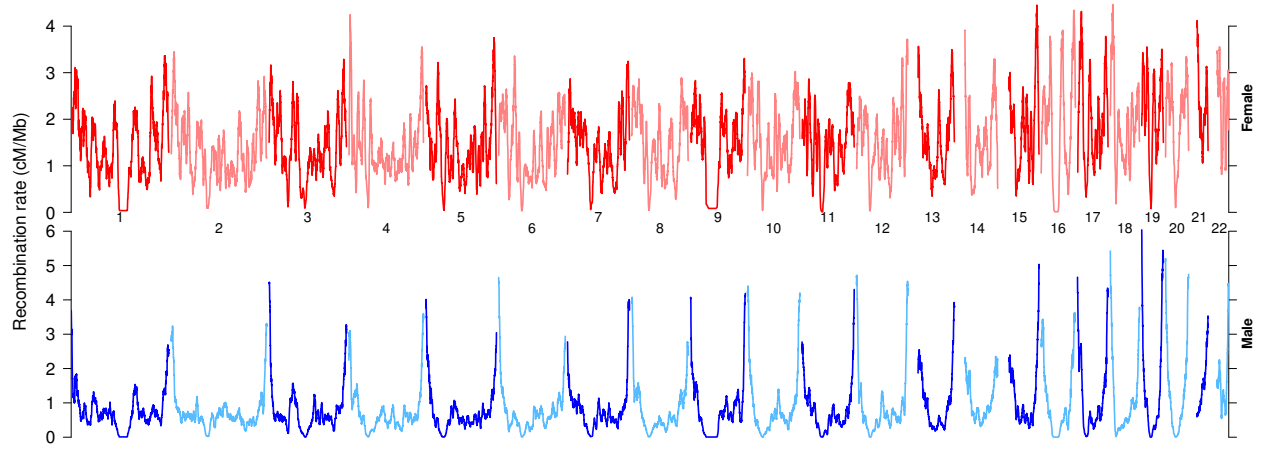

Figure S10: Recombination rate across the human genome using the 23andMe genetic maps<sup>3</sup>. Female rates are shown in shades of red, male rates in blue shades. Recombination rates were smoothed at the 5 Mb scale.
