# Supplementary material for: A Pedigree-Based Map of Recombination in the Domestic Dog Genome
Source: PubMed Central journal article supplement (PMC5100850; doi:10.1534/g3.116.034678), 2016-09-02
Supplement: supp_g3.116.034678_TableS3.pdf [file supp_g3.116.034678_TableS3.pdf]

|                | Size (kb) | Male rate | Female rate | Difference (male - female) |
|----------------|-----------|-----------|-------------|----------------------------|
| TSS upstream   | 400       | 1.01      | 0.92        | 0.09                       |
| TSS            | 50        | 1.12      | 0.92        | 0.20                       |
| TSS downstream | 400       | 1.03      | 0.94        | 0.09                       |
| CpG upstream   | 400       | 1.84      | 0.95        | 0.89                       |
| CpG island     | 50        | 2.09      | 1.11        | 0.98                       |
| CpG downstream | 400       | 1.75      | 0.97        | 0.78                       |

Table S3: Recombination rate around TSS and CpG islands. Recombination rates are given in cM/Mb and were estimated in 10kb bins, and averaged over the indicated window. Rates surrounding CpG islands represent a 50kb window centered on the CpG island, while rates for the TSS are given as a 50kb bin ending at the TSS, capturing the elevated rate immediately upstream.
